# Supplementary material for: A scheme for 3-dimensional morphological reconstruction and force inference in the early C. elegans embryo
Source: PubMed Central journal article supplement (PMC6038995; doi:10.1371/journal.pone.0199151), 2018-07-10
Supplement: pone.0199151.s003.pdf [file pone.0199151.s003.pdf]

## Parameter Table

| Parameter | Value          | Description                                                                                                       |
|-----------|----------------|-------------------------------------------------------------------------------------------------------------------|
| $p_h$     | 0.5            | The membrane probability map threshold used in the reconstruction of the embryo.                                  |
| $r_h$     | 3 (5)          | The radius of the ball used in the morphological processes for the reconstruction of the embryo.                  |
| $V_{min}$ | 2000 (500)     | The threshold for the minimum number of connected components used in the reconstruction of the embryo.            |
| $K_S$     | 50             | The number of nearest neighboring points used for membrane smoothing.                                             |
| $K_C$     | 50 (800, 3200) | The number of nearest neighboring points used for curvature computation on the membrane.                          |
| $d_T$     | 8              | The distance threshold in voxels from the other membranes from which a temporary junction point cloud is sampled. |
| $K_J$     | 240            | The number of nearest neighboring points used to thin the temporary junction point cloud.                         |
